# Supplementary material for: The HMGB Protein KlIxr1, a DNA Binding Regulator of Kluyveromyces lactis Gene Expression Involved in Oxidative Metabolism, Growth, and dNTP Synthesis
Source: MDPI journal article supplement (doi:10.3390/biom11091392), 2021-09-21
Supplement: s1 [file s1]

## Supplementary data

**Table S1.** Oligonucleotides used in this study. Lower case indicates a sequence added for cloning purposes. Bold indicates a mutated sequence. Asterisk indicates fluorescein-labeled (FAM) oligonucleotides. Numbering is considering +1 for the A in the first ATG codon. W, Watson; C, Crick.

| Name                             | Sequence                                                   | Gene            | Strand<br>(W/C) | Added<br>site | Hybridization<br>position |
|----------------------------------|------------------------------------------------------------|-----------------|-----------------|---------------|---------------------------|
| <b>IXR1 knockout in MW190-9b</b> |                                                            |                 |                 |               |                           |
| ECV719                           | GGGgcatgcCAGACGGGCCAGACAGC<br>GGGgtcgacCGGAATGTACGTTGGATCT | <i>KIIXR1</i>   | W               | <i>SphI</i>   | -698                      |
| ECV720                           | GC<br>TTTgcgccgcTGTTCGCTATGTCCTTGGT                        | <i>KIIXR1</i>   | C               | <i>Sall</i>   | +2005                     |
| ECV763                           | T                                                          | <i>KIIXR1</i>   | C               | <i>NotI</i>   | +12                       |
| ECV764                           | TTTgcgccgcGCTGAAGCTGCTGCAG                                 | <i>KIIXR1</i>   | W               | <i>NotI</i>   | +1374                     |
| ECV765                           | GTCTAGCACTCTCCCAGTG                                        | <i>KIIXR1</i>   | W               | -             | -640                      |
| ECV766                           | GAGAAGTCGTATATGCCTTCATTAC                                  | <i>KIIXR1</i>   | C               | -             | +1968                     |
| ECV315K2                         | CGCCTTAATTAACCCGGGGAT                                      | <i>KanMX4</i>   | W               | -             | +1322                     |
| ECV314K3                         | GCCTCGACATCATCTGCCCAG<br>TTAGGAAACCATTGTACATAGATTT         | <i>KanMX4</i>   | C               | -             | +45                       |
| ECV808AR                         | GTG                                                        | <i>KIIXR1</i>   | W               | -             | -822                      |
| ECV809AR                         | TCCTATCCACCTTTCAGGATACAAC                                  | <i>KIIXR1</i>   | C               | -             | +2241                     |
| <b>Northern blot</b>             |                                                            |                 |                 |               |                           |
| ECV051                           | GGGGTCGACTTGGCAGAAGAACGAA<br>TAACAGA                       | <i>KIHEM13</i>  | W               |               | +29                       |
| ECV053                           | GGGGGATCCCATCGAGGCCTTGAGGA<br>AAA                          | <i>KIHEM13</i>  | C               |               | -764                      |
| U3F                              | CGACGTACTTCAGTATGTAA                                       | <i>KISNR17A</i> | W               |               | +3                        |
| U3R                              | ATTTGTACCCACCCATAGAG                                       | <i>KISNR17A</i> | C               |               | +475                      |
| <b>RT-qPCR</b>                   |                                                            |                 |                 |               |                           |
| AVV83q                           | AAATGGAAGACAACCCGCC                                        | <i>KITAF10</i>  | W               | -             | +217                      |
| AVV84q                           | TTACGAATTCTGTGTAGCAAGAGC                                   | <i>KITAF10</i>  | C               | -             | +315                      |
| AVV85q                           | ACCTGGAATGCGGACGG                                          | <i>KIHEM13</i>  | W               | -             | +558                      |
| AVV86q                           | TGTCCAAAGCATCCTTGTGC                                       | <i>KIHEM13</i>  | C               | -             | +662                      |
| AJVV164f                         | GGAATGTTGGTGGTGGTAAGA                                      | <i>KISFP1</i>   | W               | -             | +374                      |
| AJVV165r                         | TGGCCACAGCAGCTATAATC                                       | <i>KISFP1</i>   | C               | -             | +497                      |
| AJVV166f                         | GAGTTACCCAAGCCCAGAAA                                       | <i>KIABF1</i>   | W               | -             | +421                      |

|          |                         |                |   |   |       |
|----------|-------------------------|----------------|---|---|-------|
| AJVV167r | CAGAGGAAGATCTTGGCCTAAC  | <i>KIABF1</i>  | C | - | +566  |
| AJVV168f | GCCACTATCTTCGGGAGTAAAT  | <i>KITEC1</i>  | W | - | +1452 |
| AJVV169r | CAGTGTTTCATGGTTGCAGTTC  | <i>KITEC1</i>  | C | - | +1555 |
| AJVV170f | CCTCAAGTAGCACAGGTTTCTC  | <i>KISOK2</i>  | W | - | +199  |
| AJVV171r | CGCATAGCCCAGATACTGATT   | <i>KISOK2</i>  | C | - | +324  |
| AJVV172f | GCGACAAAGCGGACATAGA     | <i>KIUME6</i>  | W | - | +761  |
| AJVV173r | CAAGGATCGGCGAAGATGAA    | <i>KIUME6</i>  | C | - | +895  |
| AJVV174f | CGTTAATGGTGGTGACTCTCTC  | <i>KIDAL81</i> | W | - | +21   |
| AJVV175r | CAACTGAAGTGGTCTCCTTACC  | <i>KIDAL81</i> | C | - | +139  |
| AJVV176f | AGATATTTCACCCACGCTTCTC  | <i>KICRF1</i>  | W | - | +1021 |
| AJVV177r | ACCTTCGATGGAATCCTCTTTC  | <i>KICRF1</i>  | C | - | +1144 |
| AJVV178f | CCTGTTCTGAGGCTAGAAATG   | <i>KIRNR1</i>  | W | - | +1534 |
| AJVV179r | TTCAAATGGAGTACGGCAGAG   | <i>KIRNR1</i>  | C | - | +1635 |
| AJVV180f | GATACTTCATGGATGCTCTACCC | <i>KIRNR2</i>  | W | - | +926  |
| AJVV181r | TACCCAAGGCGACCAATAATC   | <i>KIRNR2</i>  | C | - | +1030 |
| AJVV182f | CTGGGATGACGACGAATTAGAT  | <i>KIDUN1</i>  | W |   | +1164 |
| AJVV183r | ACGTAAGAAGGTGTTCCACATAG | <i>KIDUN1</i>  | C | - | +1274 |
| AJVV184f | GACTCGCTCAAGATGGCTTAC   | <i>KLMEC1</i>  | W | - | +3751 |
| AJVV185r | TTCCGTTGGCTGCTTGATAG    | <i>KLMEC1</i>  | C | - | +3850 |
| AJVV218f | GATTGCGTTCGGTAAAGTCAAG  | <i>KISCH9</i>  | W | - | +1608 |
| AJVV219r | GGCACCAAGTCTATGTTAGGA   | <i>KISCH9</i>  | C | - | +1713 |
| AJVV220f | CAGATCCAGTTGCCGAGATTAG  | <i>KITOR1</i>  | W | - | +1901 |
| AJVV221r | GACTTCGTCATTCAGAGCCATAA | <i>KITOR1</i>  | C | - | +2043 |
| AJVV222f | CTGAGTCTTCCGGGTTTGTT    | <i>KIRAP1</i>  | W | - | +320  |
| AJVV223r | CGTTGATCCCTGTTGCTATCT   | <i>KIRAP1</i>  | C | - | +451  |
| AJVV224f | GAAGGAGGTACAATGGCAGTAG  | <i>KIIFH1</i>  | W | - | +370  |
| AJVV225r | GTACTCGAACTGTCGCTATCATC | <i>KIIFH1</i>  | C | - | +476  |
| AJVV226f | AACACGCCTGCCTCTAATAC    | <i>KIFHL1</i>  | W | - | +687  |
| AJVV227r | CGATCGCCTTCGATAATAACT   | <i>KIFHL1</i>  | C | - | +819  |
| AJVV228f | CCCATTCTTGAGAGACCATTTC  | <i>KIDOT6</i>  | W | - | +1511 |
| AJVV229r | GTTCATTAGCAGCCTGTGTTTG  | <i>KIDOT6</i>  | C | - | +1630 |

---

#### ***KlIxr1* protein production**

---

|          |                                  |               |   |                |       |
|----------|----------------------------------|---------------|---|----------------|-------|
|          | GCGGattaatATGAATCTCAATAACCAA     |               |   |                |       |
| AVV021   | GGACATAGC                        | <i>KIIXR1</i> | W | <i>VspI</i>    | +1    |
|          | GGGaagcttTCATTCTGCAGCAGCTTCA     |               |   |                |       |
| AVV022   | GC                               | <i>KIIXR1</i> | C | <i>HindIII</i> | +1374 |
|          | GGGGacaagttgtacaaaaagcagctTCATGC |               |   |                |       |
| AJVV024f | ACCATCACCATCACCATTAATCTCAAT      | <i>KIIXR1</i> | W | <i>attB1</i>   | +4    |

|          |                                   |               |   |              |       |
|----------|-----------------------------------|---------------|---|--------------|-------|
|          | AACCAAGGACATAGCGAACATCAGG         |               |   |              |       |
|          | GGGgaccacttgtacaagaagctgggtCCTATT |               |   |              |       |
| AJVV025r | CTGCAGCAGCTTCAGCTTCATGTTCCG       | <i>KIIXR1</i> | C | <i>attB2</i> | +1374 |

| EMSA & FA assays |                             |                |   |   |      |
|------------------|-----------------------------|----------------|---|---|------|
|                  | ATCTTGAATGTATGTTGGTTCAGCCTC |                |   |   |      |
| AJVV009f*        | TATTTCTCTCGTA               | <i>KIHEM13</i> | W | - | -389 |
|                  | TACGAGAGAAATAGAGGCTGAACCA   |                |   |   |      |
| AJVV010r         | ACATACATTCAAGAT             | <i>KIHEM13</i> | C | - | -389 |
|                  | ATCTTGAATGTATGTGCGCACAGCCT  |                |   |   |      |
| AJVV011f         | CTATTTCTCTCGTA              | <i>KIHEM13</i> | W | - | -389 |
|                  | TACGAGAGAAATAGAGGCTGTGCGC   |                |   |   |      |
| AJVV012r         | ACATACATTCAAGAT             | <i>KIHEM13</i> | C | - | -389 |
|                  | ATCTTGAATGTATGTTGGTTCAGCCTC |                |   |   |      |
| AJVV013f         | TTGCGCACTCGTA               | <i>KIHEM13</i> | W | - | -389 |
|                  | TACGAGTGCGCAAGAGGCTGAACCA   |                |   |   |      |
| AJVV014r         | ACATACATTCAAGAT             | <i>KIHEM13</i> | C | - | -389 |
|                  | ATCTTGAATGTATGTTGGTTCAGCCTC |                |   |   |      |
| AJVV015f         | TATTTCTCTCGTA               | <i>KIHEM13</i> | W | - | -389 |
|                  | TTAATTGCAATTGTTACTGTTGATTTT |                |   |   |      |
| AJVV029f*        | AAA                         | <i>KIYCF1</i>  | C | - | -578 |
|                  | TTAATTGCAATTGTTACTGTTGATTTT |                |   |   |      |
| AJVV030f         | AAA                         | <i>KIYCF1</i>  | W | - | -578 |
|                  | TTTAAAATCAACAGTAACAATTGCAA  |                |   |   |      |
| AJVV031r         | TTAA                        | <i>KIYCF1</i>  | C | - | -578 |
|                  | ATCTTGAATGTATGTTGGTTCAGCCTC |                |   |   |      |
| AJVV045f*        | TCC                         | <i>KIHEM13</i> | W | - | -389 |
|                  | GGAGAGGCTGAACCAACATACATTC   |                |   |   |      |
| AJVV046r         | AAGAT                       | <i>KIHEM13</i> | C | - | -389 |
|                  | ATCTTGAATGTATGTTGGTTCAGCCTC |                |   |   |      |
| AJVV047f         | TCC                         | <i>KIHEM13</i> | W | - | -389 |
|                  | ATCTTGAATGTATGTGCGCACAGCCT  |                |   |   |      |
| AJVV048f         | CTCC                        | <i>KIHEM13</i> | W | - | -389 |
|                  | GGAGAGGCTGTGCGCACATACATTCA  |                |   |   |      |
| AJVV049r         | AGAT                        | <i>KIHEM13</i> | C | - | -389 |
|                  | TGGCCCAGCCTCTATTTCTCTCGTACC |                |   |   |      |
| AJVV050f*        | GGT                         | <i>KIHEM13</i> | W | - | -369 |
|                  | ACCGGTACGAGAGAAATAGAGGCTG   |                |   |   |      |
| AJVV051r         | GGCCA                       | <i>KIHEM13</i> | C | - | -369 |
|                  | TGGCCCAGCCTCTATTTCTCTCGTACC |                |   |   |      |
| AJVV052f         | GGT                         | <i>KIHEM13</i> | W | - | -369 |
|                  | TGGCCCAGCCTCTTGCGCACTCGTAC  |                |   |   |      |
| AJVV053f         | CGGT                        | <i>KIHEM13</i> | W | - | -369 |

|          |                            |         |   |   |      |
|----------|----------------------------|---------|---|---|------|
|          | ACCGGTACGAGTGC GCAAGAGGCTG |         |   |   |      |
| AJVV054r | GGCCA                      | KIHEM13 | C | - | -369 |
|          | TTAATTGCATGCGCAACTGTTGATTT |         |   |   |      |
| AJVV055f | TAAA                       | KIYCF1  | W | - | -578 |
|          | TTTAAAATCAACAGTTGCGCATGCAA |         |   |   |      |
| AJVV056r | TTAA                       | KIYCF1  | C | - | -578 |
|          | TTAATTGCAATTGTTTGCGCAGATTT |         |   |   |      |
| AJVV057f | TAAA                       | KIYCF1  | W | - | -578 |
|          | TTTAAAATCTGCGCAAACAATTGCAA |         |   |   |      |
| AJVV058r | TTAA                       | KIYCF1  | C | - | -578 |

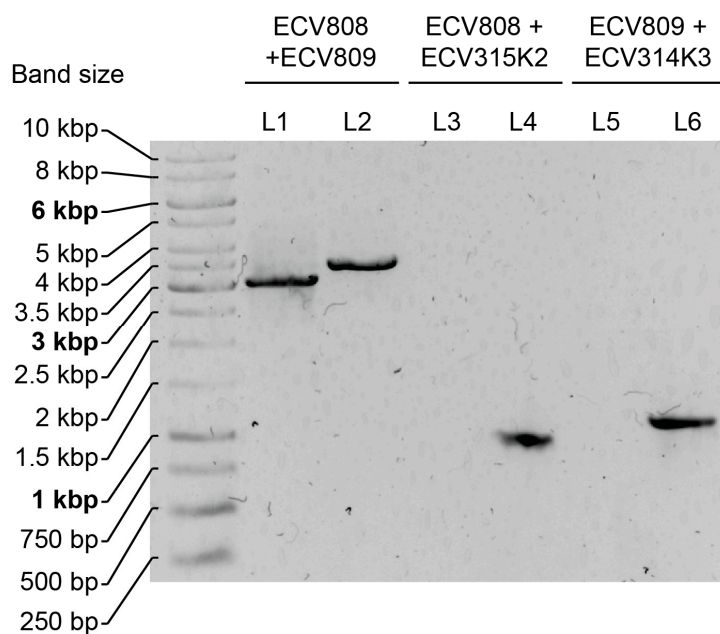

**Figure S1:** Verification of MW190-9b-*klixr1*Δ null strain by PCR and agarose gel electrophoresis. Genomic DNA from the wild type (lanes L1, L3 and L5) or the derivative with the *KIIXR1* gene knocked out by the insertion of the cassette with the kanMX4 resistance gene (lanes L2, L4 and L6) were used as templates. Expected band size: L1: 3088 bp; L2: 3245 bp; L3: no band; L4: 953 bp; L5: no band; L6: 1035 bp.

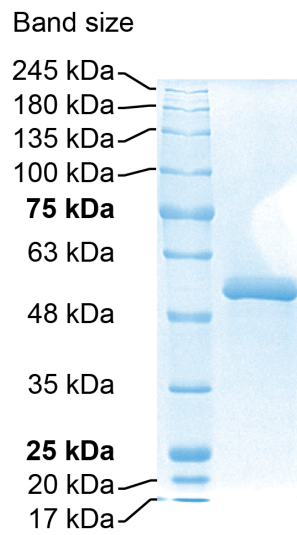

**Figure S2:** SDS-PAGE gel of *KILxr1* protein. The protein was produced by heterologous expression in *Escherichia coli* and fully isolated up to a high grade of purity. Expected molecular weight: 51.3 kDa.
